# Supplementary material for: Total protein concentration quantification using nanobeads with a new highly luminescent terbium(iii) complex
Source: Royal Society of Chemistry journal article supplement (doi:10.1039/c6ra23207h), 2016-01-01
Supplement: c6ra23207h1.pdf [file c6ra23207h1.pdf]

**Total protein concentration quantification using nanobeads**  
**with a new highly luminescent terbium (III) complex**

Piotr J. Cywiński, Marek Pietraszkiewicz, Michał Maciejczyk, Krzysztof Górski, Tommy  
Hammann, Konstanze Liermann, Bernd-Reiner Paulke and Hans-Gerd Löhmannsröben

SUPPORTING INFORMATION

1. NMR and mass spectroscopic characterization of [(tpip)<sub>3</sub>Tb]-1,4,8,9-tetraazatriphenylene complex - (Tpip)<sub>3</sub>Tb-(TAP)
2. REM images of nanoparticles
3. Results of DLS experiments
4. Results of the robustness test
5. The calculation of Förster radius for ((Tpip)<sub>3</sub>Tb-(TAP))-Cy5 donor-acceptor pair

# 1. NMR and mass spectroscopic characterisation of [(tpip)3Tb]-1,4,8,9-tetraazatriphenylene complex

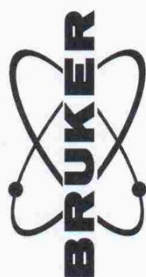

Current Data Parameters  
NAME TpipT6N4  
EXPNO 2  
PROCNO 1

F2 - Acquisition Parameters  
Date\_ 20151123  
Time 9.53  
INSTRUM DRX  
PROBHD 5 mm TBI 1H/13  
PULPROG zg30  
TD 65536  
SOLVENT CDCl3  
NS 64  
DS 0  
SWH 10330.578 Hz  
FIDRES 0.157632 Hz  
AQ 3.1719923 sec  
RG 181  
DE 48.400 usec  
TE 6.78 usec  
TD0 1.00000000 sec  
DI 1

===== CHANNEL f1 =====  
NUC1 1H  
P1 8.20 usec  
PL 5.00 dB  
SFO1 500.1330885 MHz

F2 - Processing parameters  
SI 32768  
SF 500.1300283 MHz  
WDW EM  
SSB 0  
LB 0.30 Hz  
GB 0  
PC 1.00

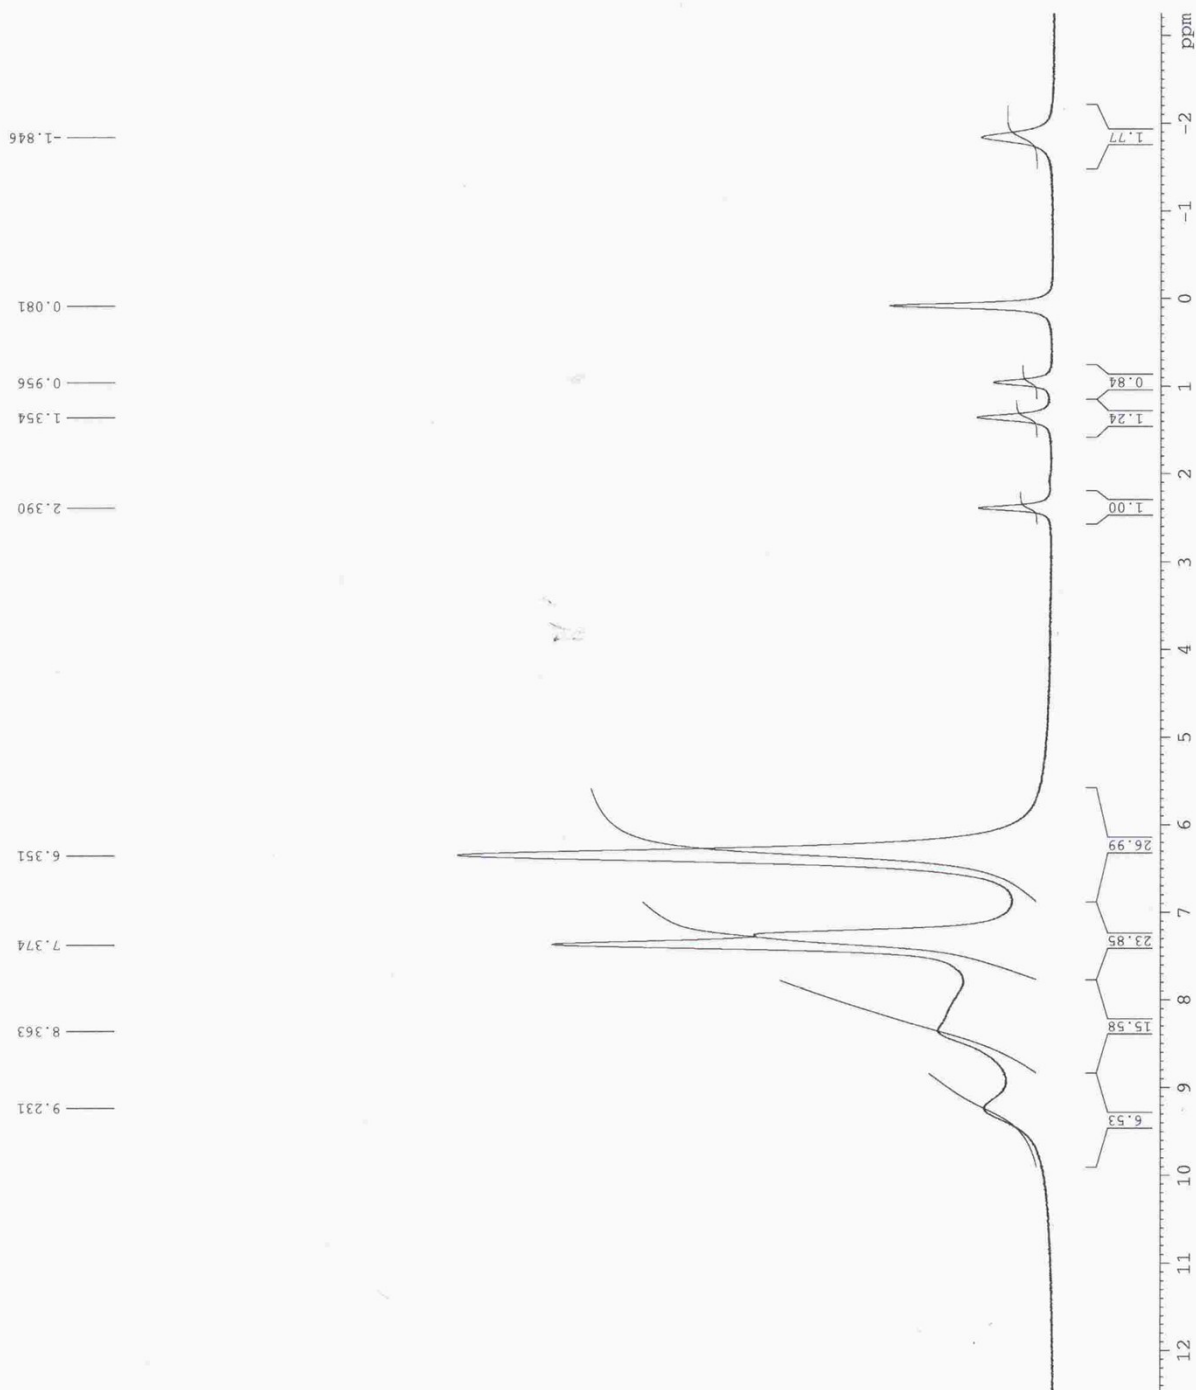

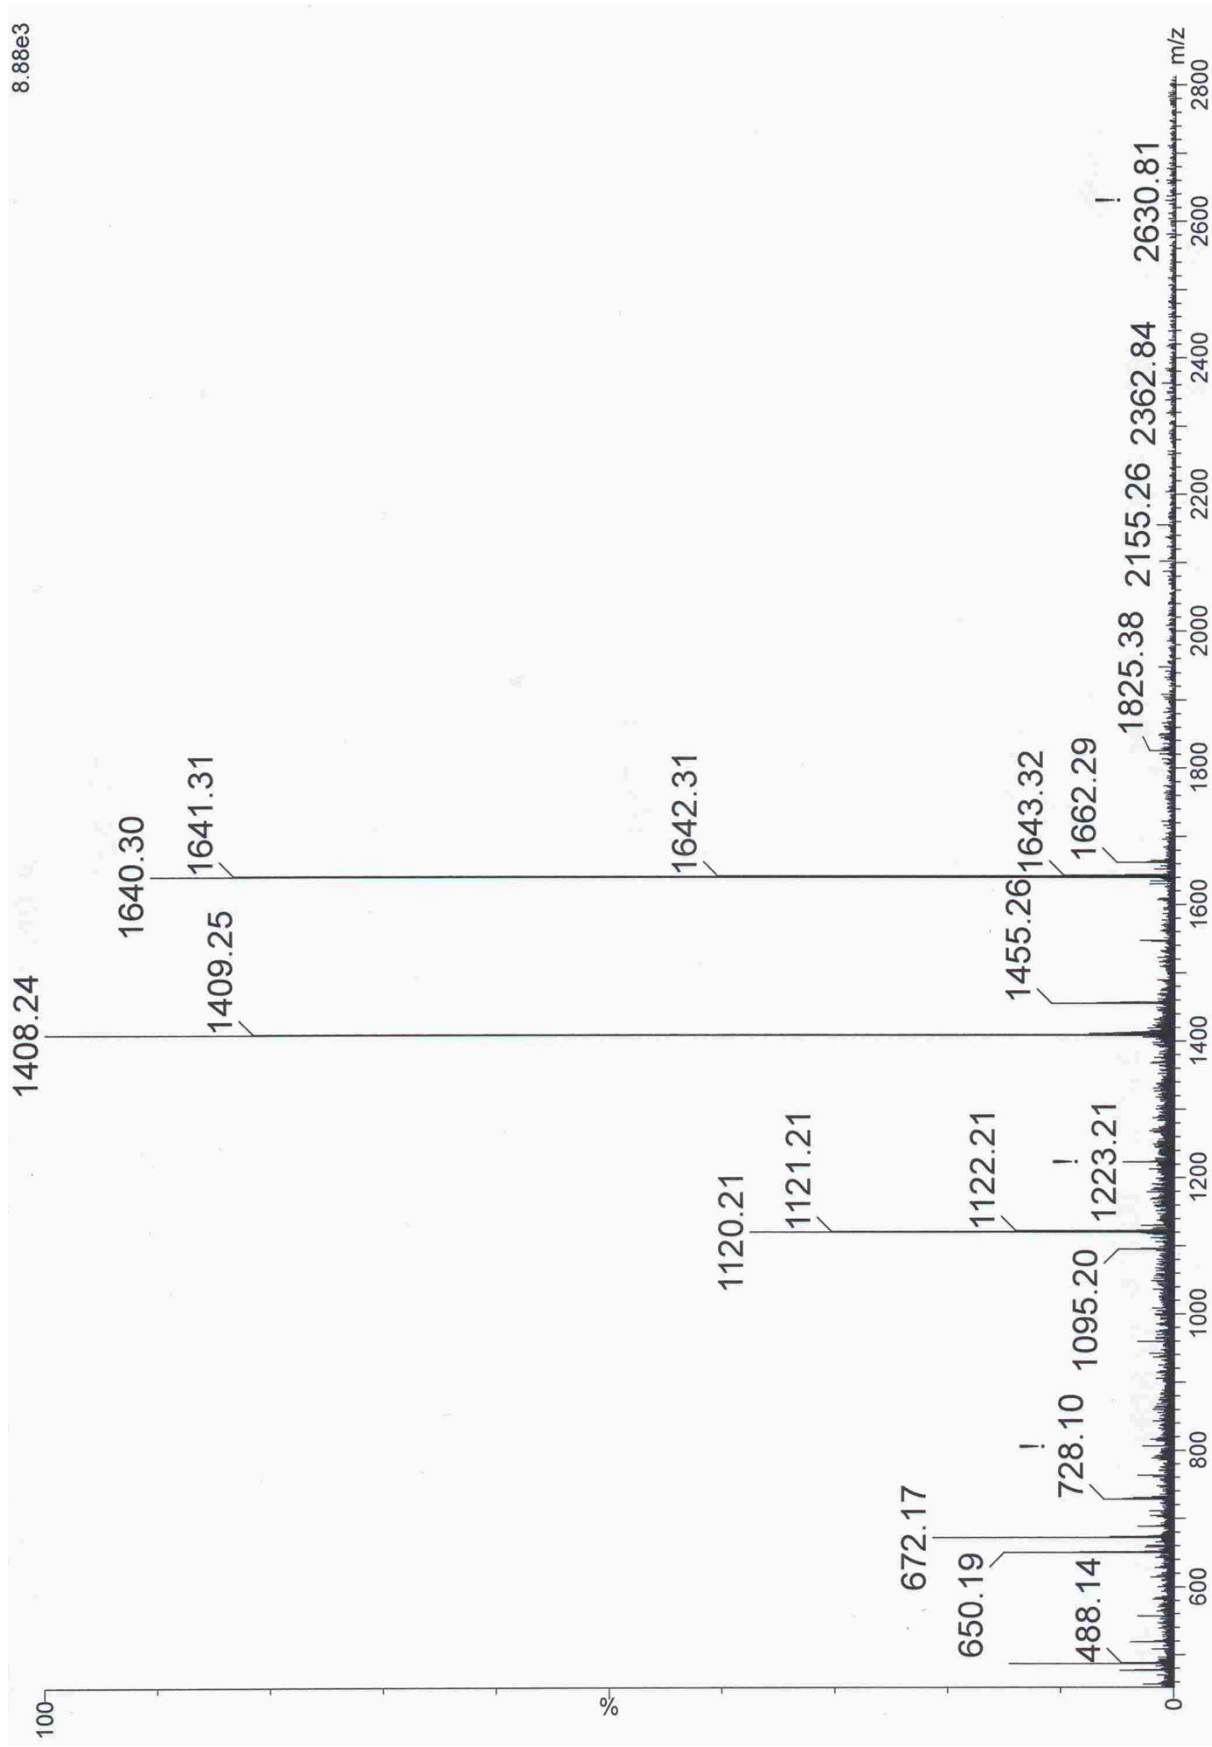

## 2. REM image of nanoparticles

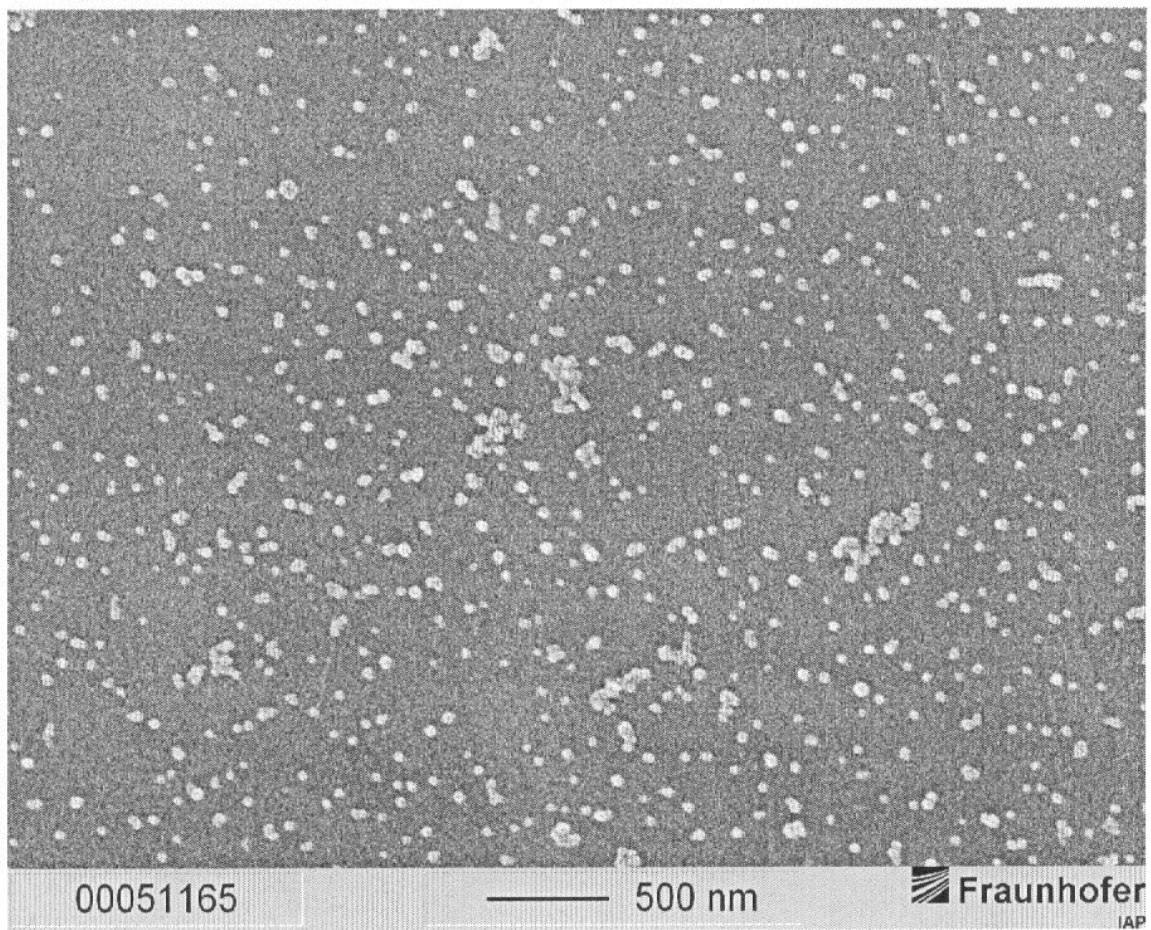

### 3. Results of DLS experiments

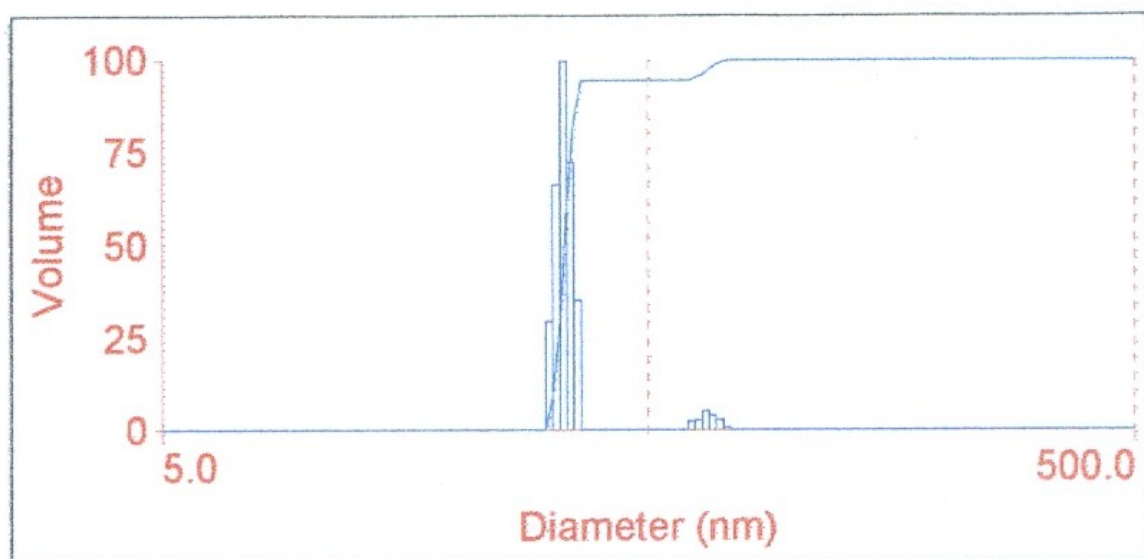

**Multimodal Size Distribution**

| d(nm) | G(d) | C(d) | d(nm) | G(d) | C(d) | d(nm) | G(d) | C(d) |
|-------|------|------|-------|------|------|-------|------|------|
| 27.4  | 0    | 0    | 39.6  | 0    | 95   | 57.3  | 0    | 95   |
| 28.3  | 0    | 0    | 41.0  | 0    | 95   | 59.3  | 0    | 95   |
| 29.3  | 0    | 0    | 42.4  | 0    | 95   | 61.3  | 2    | 95   |
| 30.3  | 0    | 0    | 43.8  | 0    | 95   | 63.4  | 3    | 96   |
| 31.3  | 29   | 9    | 45.3  | 0    | 95   | 65.6  | 5    | 98   |
| 32.4  | 66   | 30   | 46.9  | 0    | 95   | 67.8  | 4    | 99   |
| 33.5  | 100  | 61   | 48.5  | 0    | 95   | 70.1  | 3    | 100  |
| 34.6  | 72   | 84   | 50.1  | 0    | 95   | 72.5  | 1    | 100  |
| 35.8  | 35   | 95   | 51.8  | 0    | 95   | 75.0  | 0    | 100  |
| 37.1  | 0    | 95   | 53.6  | 0    | 95   | 77.6  | 0    | 100  |
| 38.3  | 0    | 95   | 55.4  | 0    | 95   | 80.2  | 0    | 100  |

#### 4. Results of the robustness test

| Compound                                   | Tolerable concentration [v/w %] |
|--------------------------------------------|---------------------------------|
| Sodium dodecyl sulphate                    | 0.0002%                         |
| Cetyl trimethylammonium bromide            | 0.0003%                         |
| Sorbitan trioleate                         | 2%                              |
| Polyethylene glycol sorbitan monolaurate   | 1%                              |
| Polyethylene glycol tert-octylphenyl ether | 3%                              |

The tolerable concentration is a concentration of a surfactant that resulted in maximum 20% change in the signal.

#### 5. The calculation of Förster radius for the (Tpip)3Tb-(TAP)-Cy5 donor-acceptor pair

The Förster radius  $R_0$  for the ((Tpip)3Tb-(TAP))-Cy5 donor-acceptor pair has been determined using following equation:

$$R_0 = \sqrt[6]{\frac{9\Phi_0(\ln 10)\kappa^2}{128\pi^5 n^4 N_A} J(\lambda)}$$

where  $\Phi_0$  is the donor quantum yield equal to 0.5 (determined using integrating sphere),  $\kappa^2$  is the dipole orientation factor taken as equal to 2/3 (random dipole orientation),  $N_A$  is the Avogadro's number ( $6.02 \times 10^{23} \text{ mol}^{-1}$ ) and  $n$  is the refractive index of the surrounding medium (water  $n = 1.33$ ). Based on the above equation and that the spectral overlap  $J(\lambda)$  is  $(3.2 \pm 0.10) \times 10^{15} \text{ L mol}^{-1} \text{ cm}^{-1} \text{ nm}^4$ , the Forster radius  $R_0$  for the (Tpip)3Tb-(TAP)-Cy5 donor-acceptor pair was found to be  $(5.6 \pm 0.1) \text{ nm}$ .
